# Supplementary material for: Constructing self-standing Fe2O3-Pt/NF nanoflowers with synergistic active sites for efficient electrocatalytic overall (sea) water splitting
Source: Royal Society of Chemistry journal article supplement (doi:10.1039/d4nr03572k), 2024-01-01
Supplement: d4nr03572k1.pdf [file d4nr03572k1.pdf]

## Supporting Information

### **Constructing self-standing Fe<sub>2</sub>O<sub>3</sub>-Pt/NF nanoflowers with synergistic active sites for efficient electrocatalytic overall (sea) water splitting**

Weiping Xiao <sup>a, b \*</sup>, Yue Zhang <sup>a</sup>, Changwang Ke <sup>a</sup>, Qin Zhao <sup>a</sup>, Fengyan Han <sup>a</sup>, Junpo Guo <sup>c \*</sup>, Xiaofei Yang <sup>a \*</sup>

**a.** College of Science, Institute of Materials Physics and Chemistry, Nanjing Forestry University, Nanjing 210037, China.

**b.** Key Laboratory of Advanced Energy Materials Chemistry (Ministry of Education), College of Chemistry, Nankai University, Tianjin 300071, China

**c.** Collaborative Innovation Center of Henan Province for Green Manufacturing of Fine Chemicals, Key Laboratory of Green Chemical Media and Reactions, Ministry of Education, School of Chemistry and Chemical Engineering, Henan Normal University, Xinxiang, Henan 453007, China.

E-mail address: wpxiao@njfu.edu.cn; 2023127@htu.edu.cn;

xiaofei.yang@njfu.edu.cn

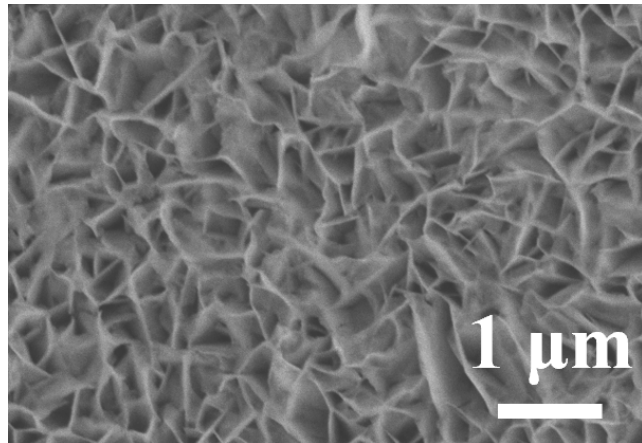

**Fig. S1** SEM image of Pt/NF.

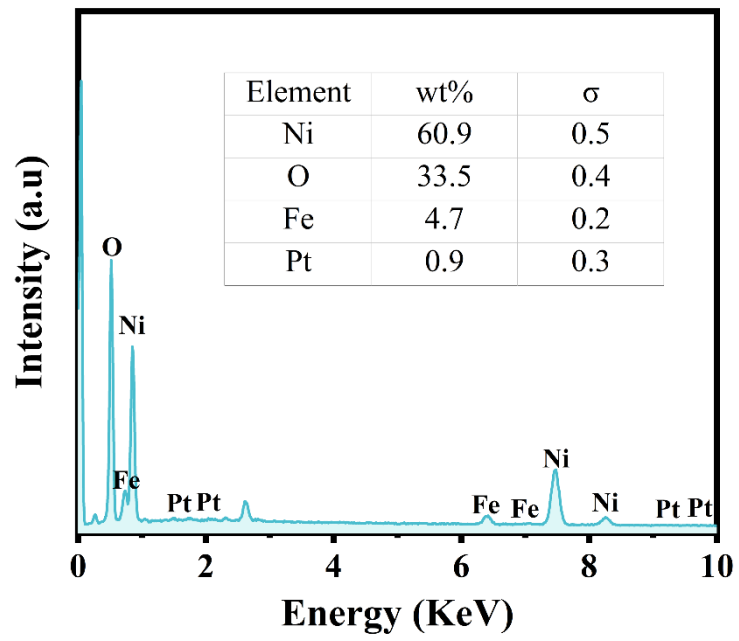

Fig. S2 EDS spectrum of Fe<sub>2</sub>O<sub>3</sub>-Pt/NF-Fe<sub>2.0</sub>.

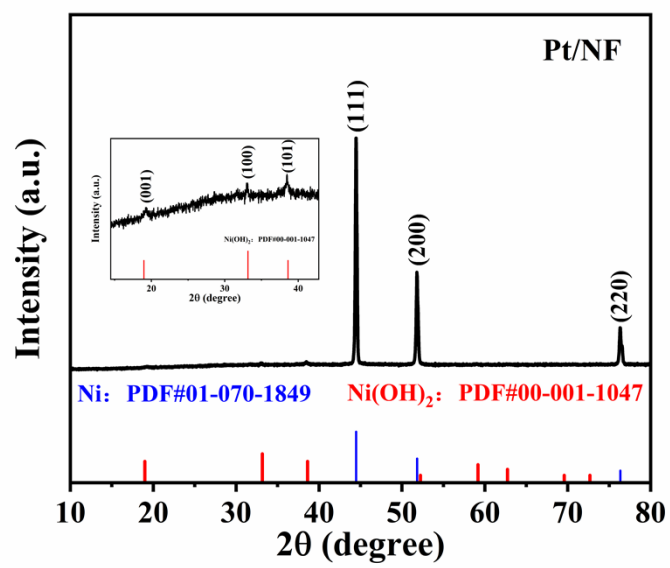

**Fig. S3** XRD spectrum of Pt/NF.

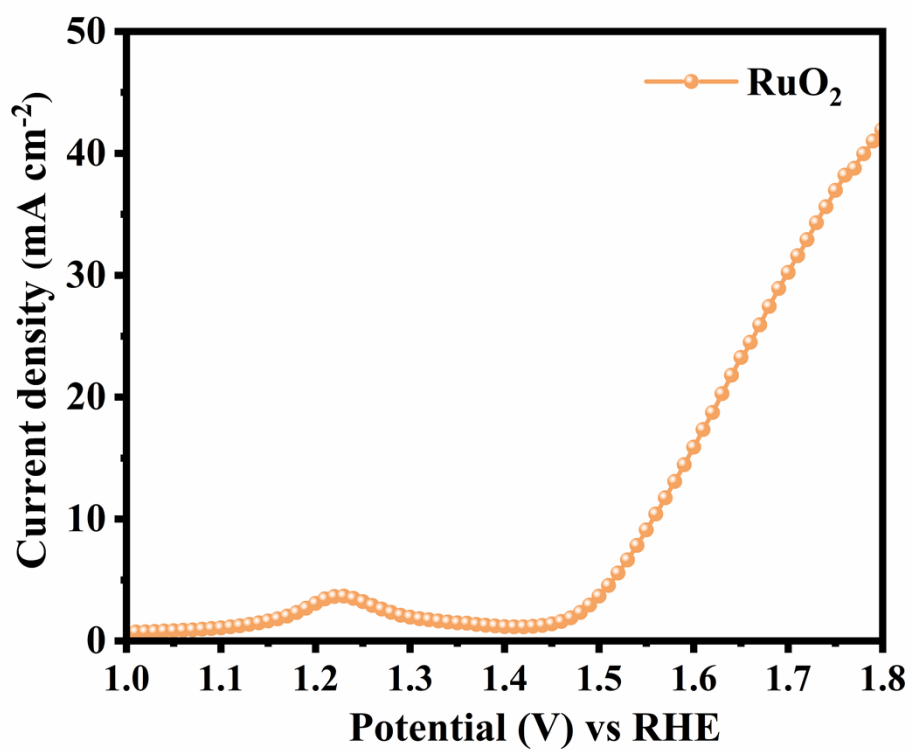

**Fig. S4** OER performance testing of RuO<sub>2</sub> in 1 M KOH solution.

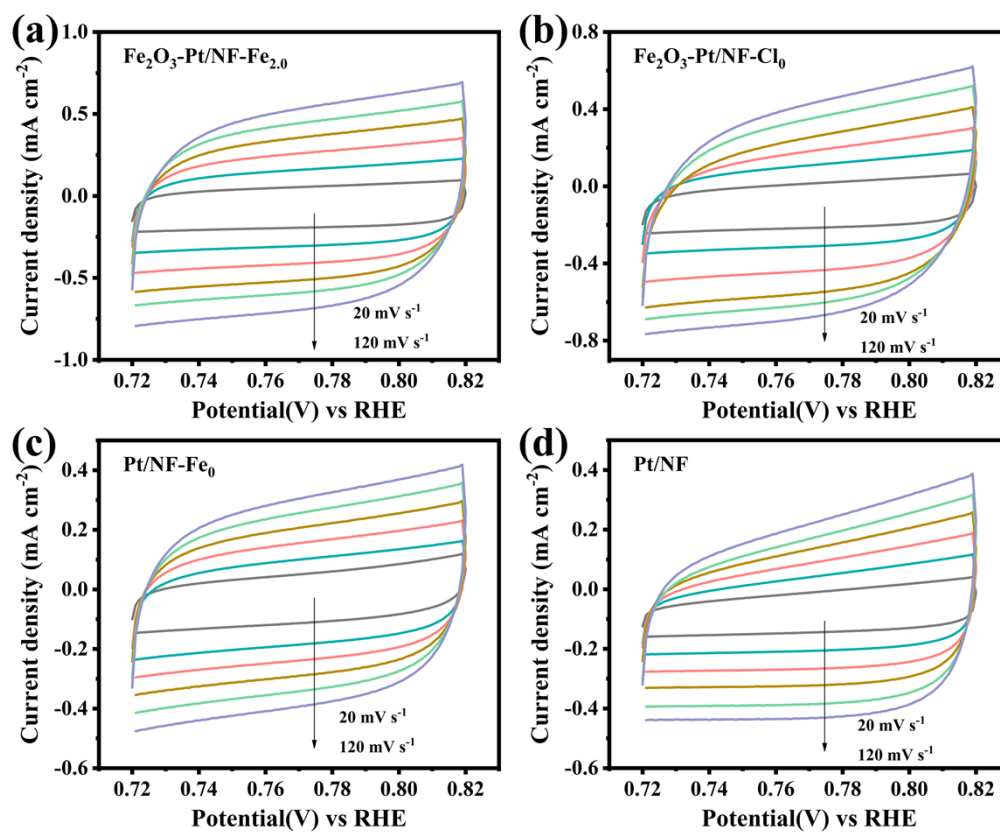

**Fig. S5** CV curves of (a)  $\text{Fe}_2\text{O}_3\text{-Pt/NF-Fe}_{2.0}$ , (b)  $\text{Fe}_2\text{O}_3\text{-Pt/NF-Cl}_0$ , (c)  $\text{Pt/NF-Fe}_0$ , and (d)  $\text{Pt/NF}$  at different scanning speeds.

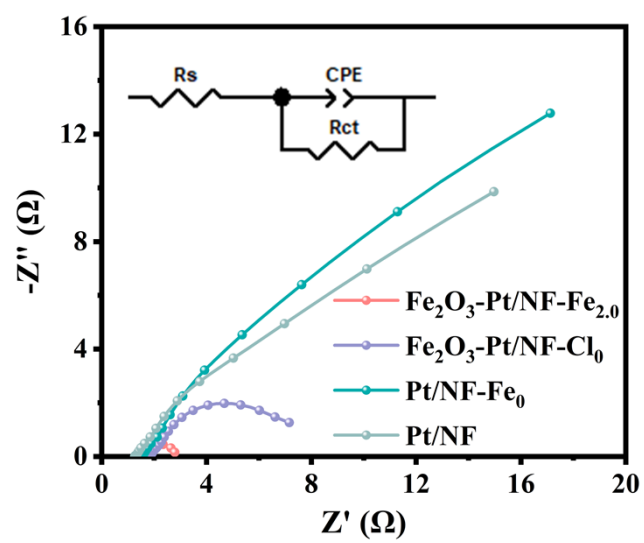

**Fig. S6** Electrochemical impedance spectroscopy (EIS) Nyquist plots.

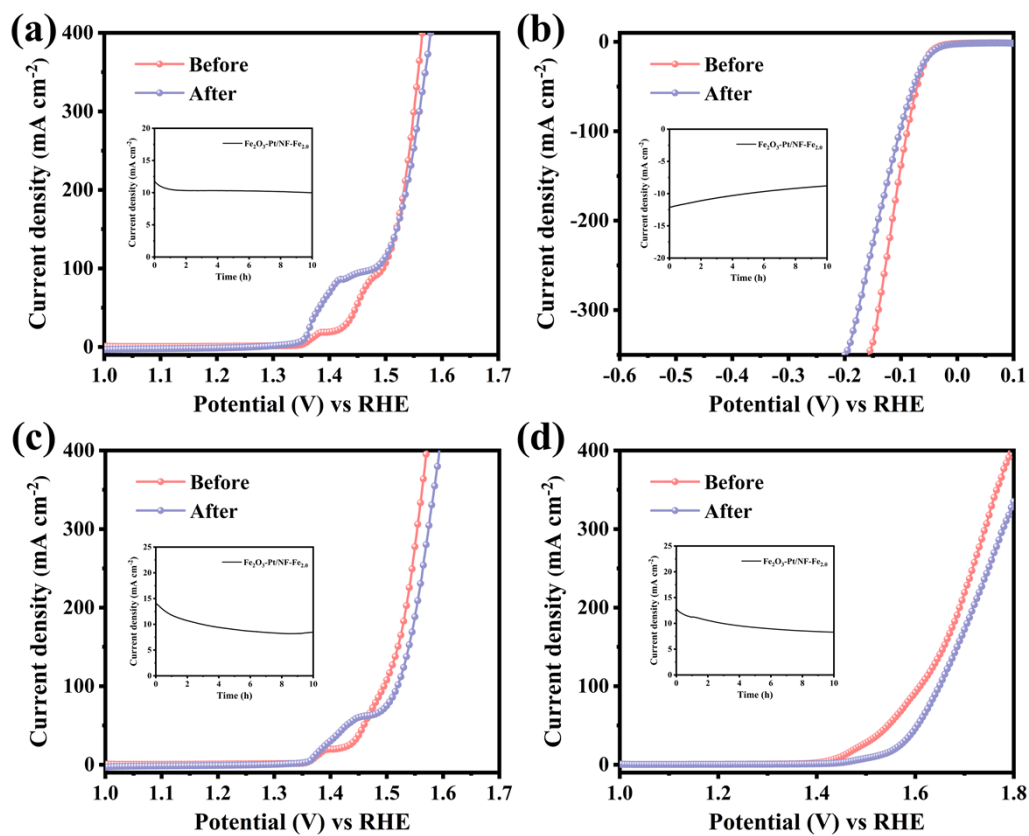

**Fig. S7** i-t curves of  $\text{Fe}_2\text{O}_3\text{-Pt/NF-Fe}_{2.0}$  running stably for 10 h and the corresponding LSV curves before and after durability. (a) OER in 1 M KOH; (b) HER and (c) OER in simulated seawater; (d) the whole seawater splitting reaction.



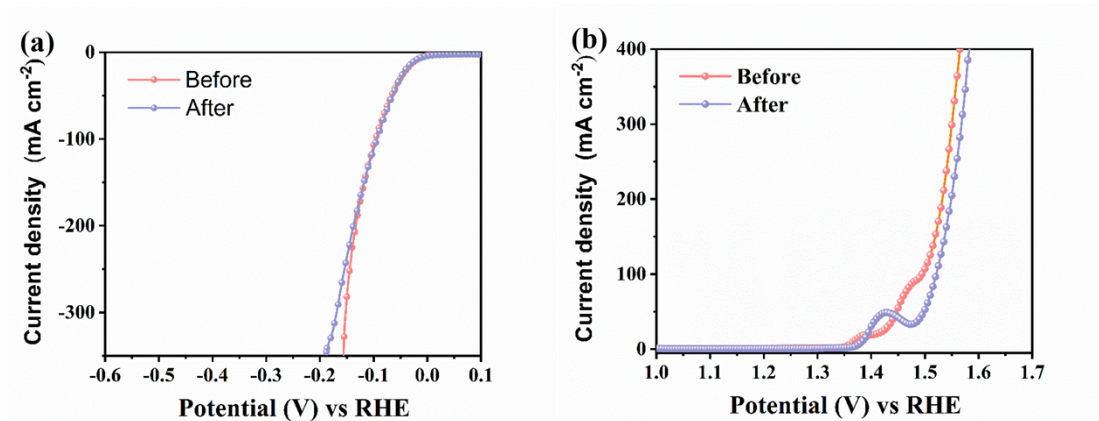

**Fig. S8** LSV curves of HER and OER performance of Fe<sub>2</sub>O<sub>3</sub>-Pt/NF-Fe<sub>2.0</sub> before and after 2000 CV cycles.

**Table S1.** ICP text result of Fe<sub>2</sub>O<sub>3</sub>-Pt/NF-Fe<sub>2.0</sub>.

| Sample                                                  | Element | wt%    |
|---------------------------------------------------------|---------|--------|
| Fe <sub>2</sub> O <sub>3</sub> -Pt/NF-Fe <sub>2.0</sub> | Pt      | 0.6806 |

**Table S2.** Comparison of the water splitting performance of catalysts reported in literatures in 1 M KOH solution. (Current density: 100 mA cm<sup>-2</sup>).

| Catalysts                                                                     | Potential | Substrate | Reference |
|-------------------------------------------------------------------------------|-----------|-----------|-----------|
| Fe <sub>2</sub> O <sub>3</sub> -Pt/NF                                         | 1.60 V    | NF        | This work |
| $\alpha$ -Co(OH) <sub>2</sub> @PN/NF                                          | 1.74 V    | NF        | 1         |
| Pt-NiFe-P/NF                                                                  | 1.65 V    | NF        | 2         |
| S-NCFO/NF                                                                     | 1.53 V    | NF        | 3         |
| CoMoO <sub>4</sub> NPAs/NF                                                    | 1.55 V    | NF        | 4         |
| Co <sub>3</sub> Fe <sub>1</sub> -LDH/rGO/NF                                   | 1.84 V    | NF        | 5         |
| (Co <sub>0.3</sub> Mn <sub>0.1</sub> Ni <sub>0.6</sub> )(OH) <sub>2</sub> /NF | 1.78 V    | NF        | 6         |

## Reference

- 1 M. Liu, S. Li, Y. Shi and N. Cai, *J. Electrochem. Soc.*, 2024, **171**, 026502.
- 2 W. Zhang, X. Chen, J. Zhao, L. Niu, G. Wang and X. Wang, *Catal. Sci. Technol.*, 2024.
- 3 Z. Wang, M. Zhang, X. Liu, H. Gao, C. Song and D. Wang, *ACS Appl. Nano Mater.*, 2024, **7**, 6196-6204.
- 4 X. Guan, L. Yang, G. Zhu, H. Wen, J. Zhang, X. Sun, H. Feng, W. Tian, X. Chen and Y. Yao, *Sustainable Energy Fuels.*, 2020, **4**, 1595-1599.
- 5 J. Guo, Z. Wei, K. Wang and H. Zhang, *International Journal of Hydrogen Energy.*, 2021, **46**, 27529-27542.
- 6 G. P. Kharabe, R. Illathvalappil, S. Barik, F. Kanheerampockil, P. S. Walko, S. K. Bhat, R. N. Devi and S. Kurungot, *Sustainable Energy Fuels.*, 2023, **7**, 2428-2440.
